# Supplementary material for: Antiviral and Antibacterial Effect of Honey Enriched with Rubus spp. as a Functional Food with Enhanced Antioxidant Properties
Source: MDPI journal article supplement (doi:10.3390/molecules27154859), 2022-07-29
Supplement: s1 [file s1]

**Table S1.** HPLC-DAD qualitative profiles of analyzed enriched honey samples. BH – blackberry harvested form ecological crop, BC – blackberry commercial, RH – raspberry harvested form ecological crop, RC – raspberry commercial, Control – basic rape honey. The numbers indicate the percentage (w/w) of the additive in creamed honey.

| Peak number | Retention time [min] | Absorption maxima [nm] | Tentative identification | Control | BH fruit 4% | BH leaf 1% | BC fruit 4% | BC leaf 1% | RH fruit 4% | RH leaf 1% | RC fruit 4% | RC leaf 1% |
|-------------|----------------------|------------------------|--------------------------|---------|-------------|------------|-------------|------------|-------------|------------|-------------|------------|
| 1           | 2.32                 | 280, 516               | cyanidin-3-galactoside*  | -       | -           | -          | -           | -          | -           | -          | +           | -          |
| 2           | 3.05                 | 280, 516               | cyanidin-3-arabinoside*  | -       | -           | -          | +           | -          | +           | -          | +           | -          |
| 3           | 3.50                 | 239, 331, 336sh        | unknown                  | +       | +           | +          | +           | +          | +           | +          | +           | +          |
| 4           | 3.58                 | 279                    | catechin isomer          | -       | -           | -          | +           | -          | -           | +          | -           | +          |
| 5           | 4.67                 | 280, 516               | cyanidin-3-glucoside*    | -       | +           | -          | -           | -          | -           | -          | -           | -          |
| 6           | 4.85                 | 280                    | (+)-catechin*            | -       | +           | +          | +           | +          | +           | -          | +           | +          |
| 7           | 5.07                 | 280, 516               | cyanidin derivative      | -       | +           | -          | -           | -          | -           | -          | -           | -          |
| 8           | 5.67                 | 219, 243, 267sh, 328   | chlorogenic acid*        | -       | -           | -          | -           | -          | -           | +          | -           | -          |
| 9           | 5.95                 | 279                    | (-)-epicatechin*         | -       | -           | +          | +           | +          | +           | -          | +           | +          |
| 10          | 6.25                 | 280                    | procyanidins             | -       | +           | +          | +           | +          | +           | +          | +           | +          |
| 11          | 6.53                 | 280                    |                          | -       | +           | +          | +           | +          | +           | +          | +           | +          |
| 12          | 6.60                 | 280                    |                          | -       | +           | +          | +           | +          | +           | +          | +           | +          |
| 13          | 6.83                 | 280                    |                          | -       | +           | +          | +           | +          | +           | +          | +           | +          |
| 14          | 7.02                 | 253, 367               | ellagic acid*            | -       | -           | +          | -           | +          | -           | +          | -           | +          |
| 15          | 7.15                 | 266, 348               | kaempferol glycoside     | +       | -           | +          | -           | +          | +           | +          | -           | +          |
| 16          | 7.28                 | 211, 226, 310          | p-coumaric acid*         | +       | -           | +          | -           | +          | -           | +          | -           | +          |
| 17          | 7.65                 | 254, 367               | rutin*                   | -       | -           | +          | -           | +          | -           | +          | -           | +          |
| 18          | 7.76                 | 257, 372               | isoquercitrin*           | -       | -           | +          | -           | +          | -           | +          | -           | +          |
| 19          | 7.90                 | 266, 348               | kaempferol glycoside     | -       | -           | +          | -           | -          | -           | -          | -           | +          |
| 20          | 7.99                 | 218, 235, 294sh, 323   | ferulic acid*            | +       | -           | -          | -           | -          | +           | -          | -           | +          |
| 21          | 8.11                 | 266, 348               | kaempferol glycoside     | -       | -           | +          | -           | -          | -           | +          | -           | +          |

|    |       |          |                            |   |   |   |   |   |   |   |   |   |
|----|-------|----------|----------------------------|---|---|---|---|---|---|---|---|---|
| 22 | 8.44  | 266, 348 | kaempferol-3<br>glucoside* | - | - | + | - | + | - | + | - | + |
| 23 | 8.71  | 268, 338 | apigenin glycoside         | - | - | + | - | - | - | + | - | - |
| 24 | 9.20  | 230      | benzoic acid*              | + | + | + | + | + | + | + | + | + |
| 25 | 9.96  | 266      | gallic acid derivative     | + | + | + | + | + | + | + | + | + |
| 26 | 10.35 | 241, 266 | unknown                    | + | + | + | + | + | + | + | + | + |
| 27 | 11.51 | 268, 338 | apigenin*                  | - | + | + | + | + | - | + | - | - |
| 28 | 11.73 | 266, 366 | kaempferol*                | + | - | + | - | + | - | + | - | - |
| 29 | 11.99 | 292      | pinobanksin*               | + | + | + | + | + | + | + | + | + |
| 30 | 12.74 | 278      | unknown                    | + | + | + | + | + | + | + | + | + |
| 31 | 14.43 | 291      | pinocembrin*               | + | + | + | + | + | + | + | + | + |

\* - identification based on comparison with analytical standard, sh – band shoulder

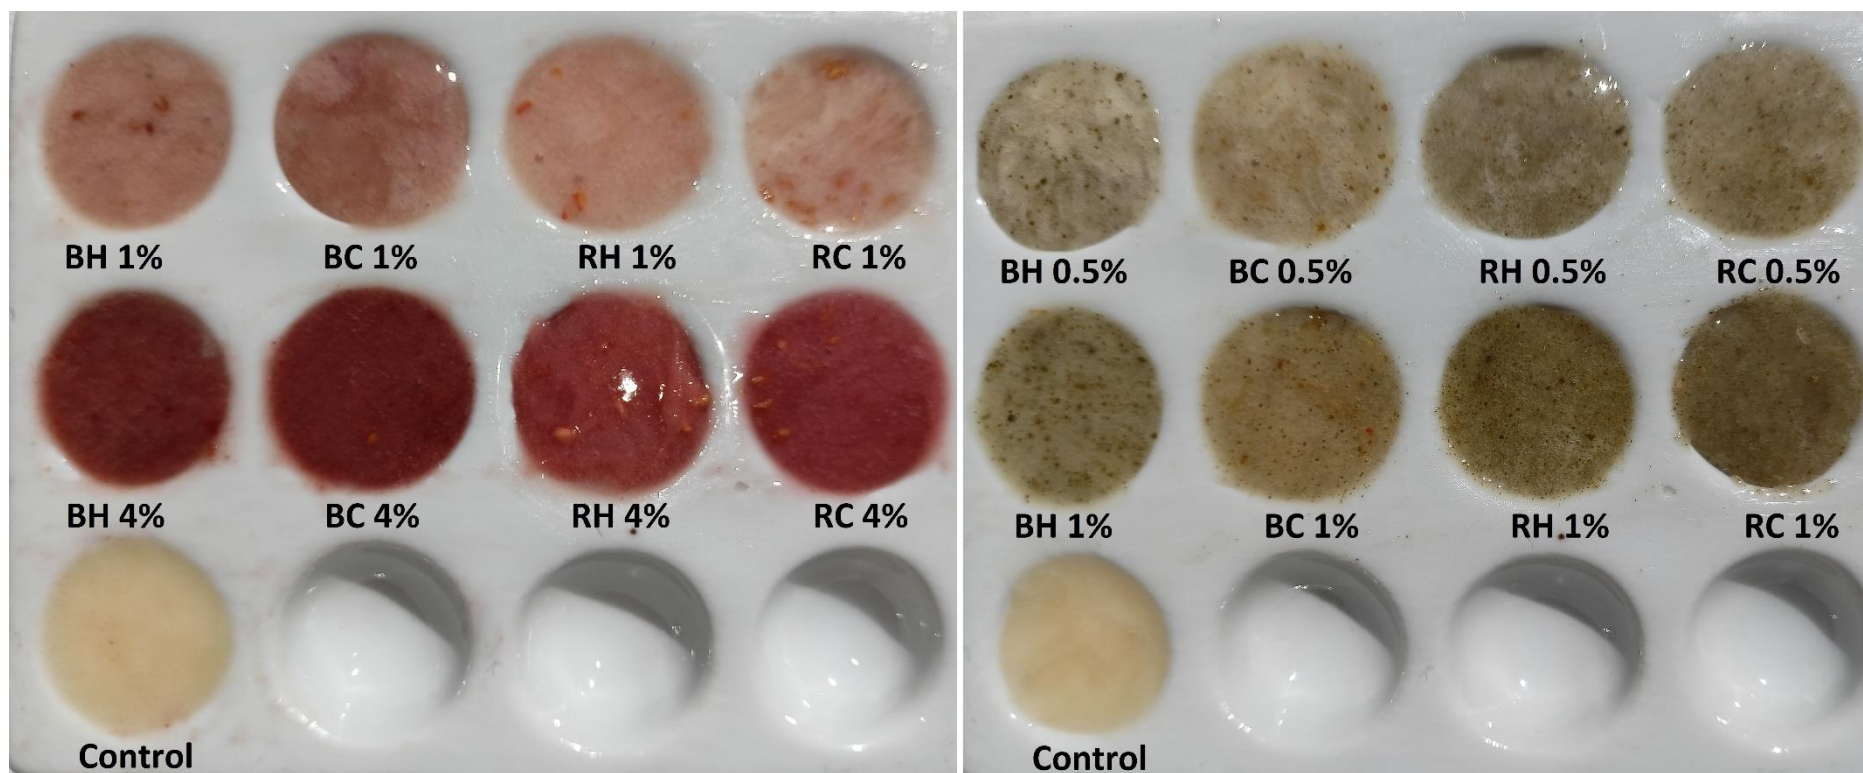

**Figure S1.** The appearance of the obtained honeys enriched with the addition of fruits (left) and leaves (right) of *Rubus* spp. BH – blackberry harvested form ecological crop, BC – blackberry commercial, RH – raspberry harvested form ecological crop, RC – raspberry commercial, Control – basic rape honey. The numbers indicate the percentage (w/w) of the additive in creamed honey.
